# Supplementary material
Source: HighWire-hosted journal article supplement (https://bmjopen.bmj.com/content/12/9/e059610)
Supplement: inline-supplementary-material-1 [file inline-supplementary-material-1.pdf]

## Late myocardial reperfusion in ST-elevation myocardial infarction: protocol for a systematic review and meta-analysis

### Supplemental material

**Table S1 Search strategy for Scopus**

| Search line | Search Terms                                |
|-------------|---------------------------------------------|
| #22         | #7 AND #15 AND #21                          |
| #21         | #16 OR #17 OR #18 OR #19 OR #20             |
| #20         | TITLE-ABS-KEY ("Myocardial Salvage**")      |
| #19         | TITLE-ABS-KEY ("Myocardium Salvage**")      |
| #18         | TITLE-ABS-KEY(Revasculari*)                 |
| #17         | TITLE-ABS-KEY(Reperfusion*)                 |
| #16         | TITLE-ABS-KEY("Myocardial Reperfusion")     |
| #15         | #8 OR #9 OR #10 OR #11 OR #12 OR #13 OR #14 |
| #14         | TITLE-ABS-KEY ("Symptom Onset")             |
| #13         | TITLE-ABS-KEY ("Delayed Comer**")           |
| #12         | TITLE-ABS-KEY ("Delayed Present**")         |
| #11         | TITLE-ABS-KEY ("Late-STEMI")                |
| #10         | TITLE-ABS-KEY ("Late comer**")              |
| #9          | TITLE-ABS-KEY (latecomer*)                  |
| #8          | TITLE-ABS-KEY ("Late Present**")            |
| #7          | #1 OR #2 OR #3 OR #4 OR #5 OR #6            |
| #6          | TITLE-ABS-KEY ("Myocardial Infarct**")      |
| #5          | TITLE-ABS-KEY ("ST segment")                |
| #4          | TITLE-ABS-KEY ("ST elevated")               |

| Search line | Search Terms                                        |
|-------------|-----------------------------------------------------|
| #3          | TITLE-ABS-KEY("Elevation Myocardial")               |
| #2          | TITLE-ABS-KEY(STEMI)                                |
| #1          | TITLE-ABS-KEY("ST Elevation Myocardial Infarction") |

**Table S2 Search strategy for Global Health**

| Search line | Search Terms                       |
|-------------|------------------------------------|
| #20         | 6 and 14 and 19                    |
| #19         | or/15-18                           |
| #18         | (Myocardial adj1 Salvage*).ti,ab.  |
| #17         | (Myocardium adj1 Salvage*).ti,ab.  |
| #16         | Revasculari*.ti,ab.                |
| #15         | Reperfusion*.ti,ab.                |
| #14         | or/7-13                            |
| #13         | Symptom Onset.ti,ab.               |
| #12         | (Delayed adj3 Comer*).ti,ab.       |
| #11         | (Delayed adj3 Present*).ti,ab.     |
| #10         | (Late adj3 STEMI).ti,ab.           |
| #9          | Late Comer*.ti,ab.                 |
| #8          | Latecomer*.ti,ab.                  |
| #7          | Late Present*.ti,ab.               |
| #6          | or/1-4                             |
| #5          | (Myocardial adj3 Infarct*).ti,ab.  |
| #4          | ST Segment.ti,ab.                  |
| #3          | ST Elevated.ti,ab.                 |
| #2          | (Elevation adj3 Myocardial).ti,ab. |
| #1          | STEMI.ti,ab.                       |

**Table S3 Search strategy for Embase**

| Search line | Search Terms                                    |
|-------------|-------------------------------------------------|
| #21         | 7 and 15 and 20                                 |
| #20         | or/16-19                                        |
| #19         | (Myocardial adj1 Salvage*).ti,ab.               |
| #18         | (Myocardium adj1 Salvage*).ti,ab.               |
| #17         | Revasculari*.ti,ab.                             |
| #16         | Reperfusion*.ti,ab.                             |
| #15         | or/8-14                                         |
| #14         | Symptom Onset.ti,ab.                            |
| #13         | (Delayed adj3 Comer*).ti,ab.                    |
| #12         | (Delayed adj3 Present*).ti,ab.                  |
| #11         | (Late adj3 STEMI).ti,ab.                        |
| #10         | Late Comer*.ti,ab.                              |
| #9          | Latecomer*.ti,ab.                               |
| #8          | Late Present*.ti,ab.                            |
| #7          | or/1-6                                          |
| #6          | (Myocardial adj3 Infarct*).ti,ab.               |
| #5          | ST Segment*.ti,ab.                              |
| #4          | ST Elevat*.ti,ab.                               |
| #3          | (Elevation adj3 Myocardial).ti,ab.              |
| #2          | STEMI.ti,ab.                                    |
| #1          | exp ST segment elevation myocardial infarction/ |

**Table S4 Search strategy for Cochrane Library**

| Search line | Search Terms                                                |
|-------------|-------------------------------------------------------------|
| #22         | #7 AND #15 AND #21                                          |
| #21         | #16 OR #17 OR #18 OR #19 OR #20                             |
| #20         | (Myocardial NEAR/3 Salvage*):ti,ab,kw                       |
| #19         | (Myocardium NEAR/3 Salvage*):ti,ab,kw                       |
| #18         | Revasculari*:ti,ab,kw                                       |
| #17         | Reperfusion*:ti,ab,kw                                       |
| #16         | MeSH descriptor: [Myocardial Reperfusion] explode all trees |
| #15         | #8 OR #9 OR #10 OR #11 OR #12 OR #13 OR #14                 |
| #14         | (Symptom NEAR/3 Onset):ti,ab,kw                             |
| #13         | (Delayed NEAR/3 Comer*):ti,ab,kw                            |
| #12         | (Delayed NEAR/3 Present*):ti,ab,kw                          |
| #11         | Late-STEMI:ti,ab,kw                                         |
| #10         | (Late NEAR/1 Comer*):ti,ab,kw                               |
| #9          | Latecomer*:ti,ab,kw                                         |
| #8          | (Late NEAR/1 Present*):ti,ab,kw                             |
| #7          | #1 OR #2 OR #3 OR #4 OR #5 OR #6                            |
| #6          | (Myocardial NEAR/1 Infarct*):ti,ab,kw                       |
| #5          | ST Segment:ti,ab,kw                                         |
| #4          | ST Elevated:ti,ab,kw                                        |
| #3          | (Elevation NEAR/3 Myocardial):ti,ab,kw                      |
| #2          | STEMI:ti,ab,kw                                              |

| Search line | Search Terms                                                               |
|-------------|----------------------------------------------------------------------------|
| #1          | MeSH descriptor: [ST Elevation Myocardial Infarction]<br>explode all trees |

**Table S5 Search strategy for CINAHL**

| Search line | Search Terms                                               |
|-------------|------------------------------------------------------------|
| S21         | S6 AND S14 AND S20                                         |
| S20         | S15 OR S16 OR S17 OR S18 OR S19                            |
| S19         | TI (Myocardial N1 Salvage*) OR AB (Myocardial N1 Salvage*) |
| S18         | TI (Myocardium N1 Salvage*) OR AB (Myocardium N1 Salvage*) |
| S17         | TI Revasculari* OR AB Revasculari*                         |
| S16         | TI Reperfusion* OR AB Reperfusion*                         |
| S15         | (MM "Myocardial Reperfusion")                              |
| S14         | S7 OR S8 OR S9 OR S10 OR S11 OR S12 OR S13                 |
| S13         | TI (Symptom N1 Onset) OR AB (Symptom N1 Onset)             |
| S12         | TI (Delayed N1 Comer*) OR AB (Delayed N1 Comer*)           |
| S11         | TI (Delayed N1 Present*) OR AB (Delayed N1 Present*)       |
| S10         | TI Late N3 STEMI OR AB Late N3 STEMI                       |
| S9          | TI Latecomer* OR AB Latecomer*                             |
| S8          | TI (Late N1 Comer*) OR AB (Late N1 Comer*)                 |
| S7          | TI (Late N1 Present*) OR AB (Late N1 Present*)             |
| S6          | S1 OR S2 OR S3 OR S4 OR S5                                 |
| S5          | TI (Myocardial N1 Infarct*) OR AB (Myocardial N1 Infarct*) |
| S4          | TI ST-Segment* OR AB ST-Segment*                           |
| S3          | TI ST-Elevated OR AB ST-Elevated                           |

| Search line | Search Terms                                                 |
|-------------|--------------------------------------------------------------|
| S2          | TI (Elevation N3 Myocardial) OR AB (Elevation N3 Myocardial) |
| S1          | TI STEMI OR AB STEMI                                         |



**Table S6 Search strategy for Web of Science**

| Search line | Search Terms                                                 |
|-------------|--------------------------------------------------------------|
| #22         | #7 AND #15 AND #21                                           |
| #21         | #16 OR #17 OR #18 OR #19 OR #20                              |
| #20         | TI=(Myocardial Salvage*) OR AB=(Myocardial Salvage*)         |
| #19         | TI=(Myocardium Salvage*) OR AB=(Myocardium Salvage*)         |
| #18         | TI=Revasculari* OR AB=Revasculari*                           |
| #17         | TI=Reperfusion* OR AB=Reperfusion*                           |
| #16         | TS=( Myocardial Reperfusion)                                 |
| #15         | #8 OR #9 OR #10 OR #11 OR #12 OR #13 OR #14                  |
| #14         | TI=(Symptom Onset) OR AB=( Symptom Onset)                    |
| #13         | TI=(Delayed NEAR Comer*) OR AB=(Delayed NEAR Comer*)         |
| #12         | TI=(Daleyed NEAR Present*) OR AB=(Delayed NEAR Present*)     |
| #11         | TI=(Late NEAR STEMI) OR AB=(Late NEAR STEMI)                 |
| #10         | TI=(Late Comer*) OR AB=(Late Comer*)                         |
| #9          | TI=Latecomer* OR AB=Latecomer*                               |
| #8          | TI=(Late Present*) OR AB=(Late Present*)                     |
| #7          | #1 OR #2 OR #3 OR #4 OR #5 OR #6                             |
| #6          | TI=(Myocardial Infarct*) OR AB=(Myocardial Infarct*)         |
| #5          | TI=( ST Segment) OR AB=(ST Segment)                          |
| #4          | TI=(ST Elevat*) OR AB=(ST Elevat*)                           |
| #3          | TI=(Elevat* NEAR Myocardial) OR AB=(Elevat* NEAR Myocardial) |

| Search line | Search Terms                            |
|-------------|-----------------------------------------|
| #2          | TI=STEMI OR AB=STEMI                    |
| #1          | TS=(ST Elevation Myocardial Infarction) |
